# Supplementary material for: Persistence of Mating Suppression of the Indian Meal Moth Plodia Interpunctella in the Presence and Absence of Commercial Mating Disruption Dispensers
Source: MDPI journal article supplement (doi:10.3390/insects11100701), 2020-10-14
Supplement: s1 [file s1]

**Table S1.** Effect of entrainment, photophase, and light conditions on mating in a 25 ml arena.

| Entrainment at Time of Pairing   | Light Condition at Time of Pairing | Trials | Mated Immediately |
|----------------------------------|------------------------------------|--------|-------------------|
| Photophase                       | Light                              | 6      | 6                 |
|                                  | Dark                               | 6      | 4                 |
| Fisher's Exact Test: $p = 0.454$ |                                    |        |                   |
| Scotophase                       | Light                              | 6      | 6                 |
|                                  | Dark                               | 6      | 6                 |
| Fisher's Exact Test: $p = 1.0$   |                                    |        |                   |

**Table S2.** Effect of photophase and light conditions on mating status of females in a 950 ml arena.

| Part of Photoperiod at Time of Pairing | Light Condition at Time of Pairing | Trials | Spermatophore Found |
|----------------------------------------|------------------------------------|--------|---------------------|
| Photophase                             | Light                              | 8      | 7                   |
| Scotophase                             | Dark                               | 7      | 7                   |

Not significant, Fisher's Exact Test,  $p = 1$ .

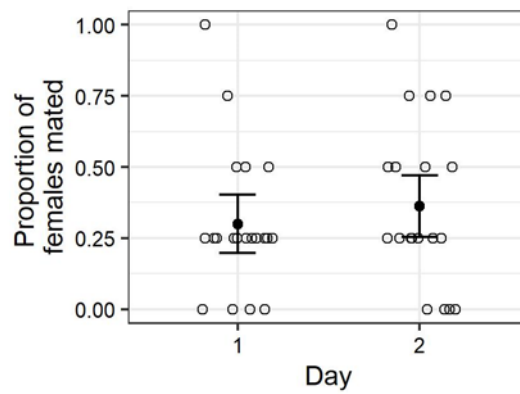

**Figure S1.** The mean number of females mated was slightly higher on day 2 of experiment 2 (36% mated) vs day 1 (30%) mated. However, the number of barrels with 0, 1, 2, 3, 4, or 5 mated females did not differ significantly between the two days of the experiment (Fisher's Exact test,  $P = 0.877$ ).
